# Supplementary material
Source: Springer Nature journal article supplement (https://www.springermedizin.de/resource/supplementary/12889_2012_4819_MOESM3_ESM.pdf/9490726)
Supplement: MOESM3 [file 9490726]

Figure 4

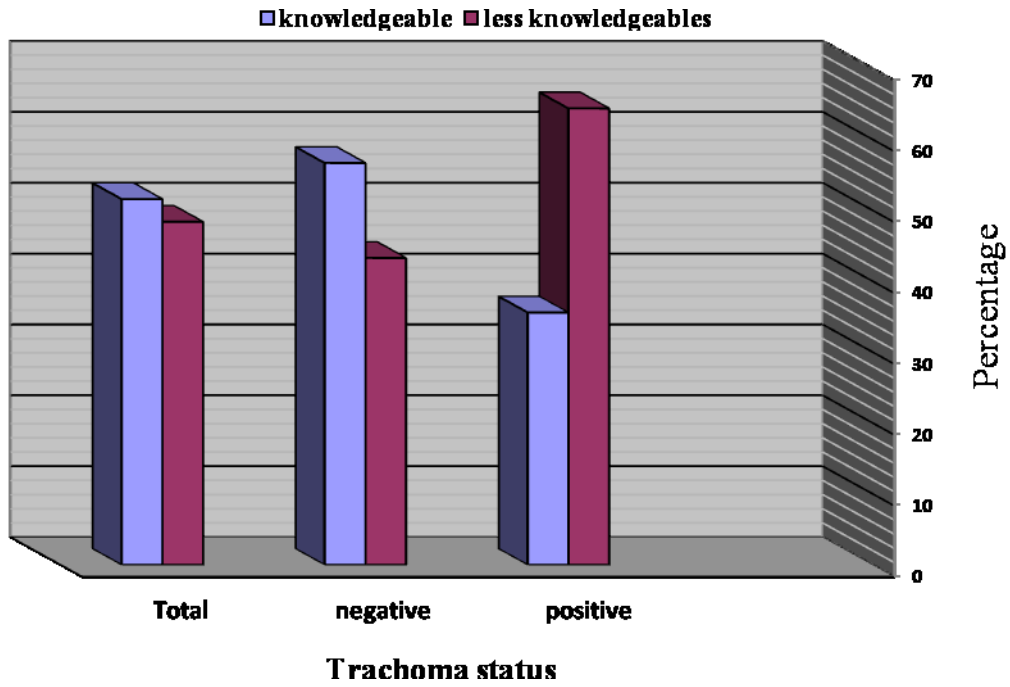

Figure 4. Awareness of head of household about trachoma and prevalence of trachoma among their children in Baso Liben district from February to April, 2012.
